# Supplementary material for: The formation of thymidine-based T-tetramers with remarkable structural and metal ion size effects
Source: Royal Society of Chemistry journal article supplement (doi:10.1039/c0ob00520g), 2010-11-09
Supplement: c0ob00520g.pdf [file c0ob00520g.pdf]

## Supporting Information

### The formation of thymidine-based T-tetramers with remarkable structural and metal ion size effects

Qun Luo, Dayong Wu, Shixiong Liu, Daihua Tang, Yong Huang, Xinhou Liu,  
Fuyi Wang, Ruiyao Wang and Gang Wu

#### Table of Contents

|                                                                                                                                                        |    |
|--------------------------------------------------------------------------------------------------------------------------------------------------------|----|
| Scheme S1. Chemical structures for <b>T</b> <sub>1</sub> , <b>T</b> <sub>2</sub> and <b>T</b> <sub>3</sub> .....                                       | 2  |
| Synthesis of <b>T</b> <sub>1</sub> .....                                                                                                               | 3  |
| Figure S1. <sup>1</sup> H NMR spectrum of <b>T</b> <sub>1</sub> in CDCl <sub>3</sub> at 298 K .....                                                    | 4  |
| Figure S2. <sup>1</sup> H NMR spectrum of <b>T</b> <sub>1</sub> in CD <sub>3</sub> CN at 298 K .....                                                   | 4  |
| Figure S3. <sup>13</sup> C NMR spectrum of <b>T</b> <sub>1</sub> in CDCl <sub>3</sub> at 298 K .....                                                   | 5  |
| Synthesis of <b>T</b> <sub>2</sub> .....                                                                                                               | 5  |
| Figure S4. <sup>1</sup> H NMR spectrum of <b>T</b> <sub>2</sub> ' in CDCl <sub>3</sub> at 298 K .....                                                  | 7  |
| Figure S5. <sup>13</sup> C NMR spectrum of <b>T</b> <sub>2</sub> ' in CDCl <sub>3</sub> at 298 K .....                                                 | 7  |
| Figure S6. <sup>1</sup> H NMR spectrum of <b>T</b> <sub>2</sub> in CDCl <sub>3</sub> at 298 K .....                                                    | 8  |
| Figure S7. <sup>13</sup> C NMR spectrum of <b>T</b> <sub>2</sub> in CDCl <sub>3</sub> at 298 K .....                                                   | 8  |
| Synthesis of <b>T</b> <sub>3</sub> .....                                                                                                               | 9  |
| Figure S8. <sup>1</sup> H NMR spectrum of <b>T</b> <sub>3</sub> ' in CDCl <sub>3</sub> at 298 K .....                                                  | 10 |
| Figure S9. <sup>13</sup> C NMR spectrum of <b>T</b> <sub>3</sub> ' in CDCl <sub>3</sub> at 298 K .....                                                 | 11 |
| Figure S10. <sup>1</sup> H NMR spectrum of <b>T</b> <sub>3</sub> in CDCl <sub>3</sub> at 298 K .....                                                   | 11 |
| Figure S11. <sup>13</sup> C NMR spectrum of <b>T</b> <sub>3</sub> in CDCl <sub>3</sub> at 298 K .....                                                  | 12 |
| X-ray crystallographic analysis for <b>T</b> <sub>2</sub> .....                                                                                        | 12 |
| Figure S12. ESI-MS of <b>T</b> <sub>2</sub> -NaCl in CH <sub>3</sub> CN .....                                                                          | 13 |
| Table S1. Signal assignment of TOF-ESI-MS for a mixture of <b>T</b> <sub>1</sub> and alkali metal chloride in acetonitrile .....                       | 14 |
| Figure S13. Comparison between experimental result and simulated isotopic pattern for TOF-ESI-MS of <b>T</b> <sub>1</sub> +Na <sup>+</sup> ion .....   | 15 |
| Figure S14. Comparison between experimental result and simulated isotopic pattern for TOF-ESI-MS of 2 <b>T</b> <sub>1</sub> +Na <sup>+</sup> ion ..... | 15 |

|                                                                                                                                                                                       |    |
|---------------------------------------------------------------------------------------------------------------------------------------------------------------------------------------|----|
| Figure S15. Comparison between experimental result and simulated isotopic pattern for TOF-ESI-MS of $3\mathbf{T}_1+\text{Na}^+$ ion .....                                             | 16 |
| Figure S16. Comparison between experimental results and simulated isotopic patterns for TOF-ESI-MS of $4\mathbf{T}_1+\text{Na}^+$ monomer and $4\mathbf{T}_1+\text{Na}^+$ dimer ..... | 16 |
| Figure S17. Comparison between experimental results and simulated isotopic patterns for TOF-ESI-MS of $4\mathbf{T}_1+\text{K}^+$ monomer and $4\mathbf{T}_1+\text{K}^+$ dimer .....   | 17 |
| Figure S18. Comparison between experimental results and simulated isotopic patterns for TOF-ESI-MS of $4\mathbf{T}_1+\text{Rb}^+$ monomer and $4\mathbf{T}_1+\text{Rb}^+$ dimer ..... | 17 |
| Figure S19. Comparison between experimental results and simulated isotopic patterns for TOF-ESI-MS of $5\mathbf{T}_1+\text{Rb}^+$ monomer and $5\mathbf{T}_1+\text{Rb}^+$ dimer ..... | 18 |
| Figure S20. Comparison between experimental result and simulated isotopic pattern for TOF-ESI-MS of $[4\mathbf{T}_1+\text{Rb}^+]+[5\mathbf{T}_1+\text{Rb}^+]$ ion .....               | 18 |
| Figure S21. Comparison between experimental results and simulated isotopic patterns for TOF-ESI-MS of $4\mathbf{T}_1+\text{Cs}^+$ monomer and $4\mathbf{T}_1+\text{Cs}^+$ dimer ..... | 19 |
| Figure S22. Comparison between experimental results and simulated isotopic patterns for TOF-ESI-MS of $5\mathbf{T}_1+\text{Cs}^+$ monomer and $5\mathbf{T}_1+\text{Cs}^+$ dimer ..... | 19 |
| Figure S23. Comparison between experimental result and simulated isotopic pattern for TOF-ESI-MS of $[4\mathbf{T}_1+\text{Cs}^+]+[5\mathbf{T}_1+\text{Cs}^+]$ ion .....               | 20 |
| Figure S24. Positive ion-mode TOF-ESI-MS sections for $\mathbf{T}_1$ -pentamers and dimeric $\mathbf{T}_1$ -pentamers in acetonitrile .....                                           | 20 |

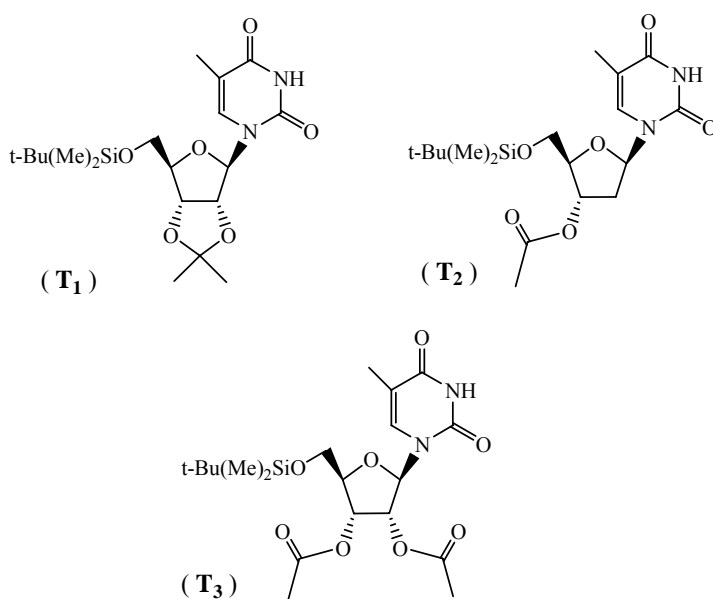

Scheme S1. Chemical structures for  $\mathbf{T}_1$ ,  $\mathbf{T}_2$  and  $\mathbf{T}_3$

## Synthesis of **T**<sub>1</sub>

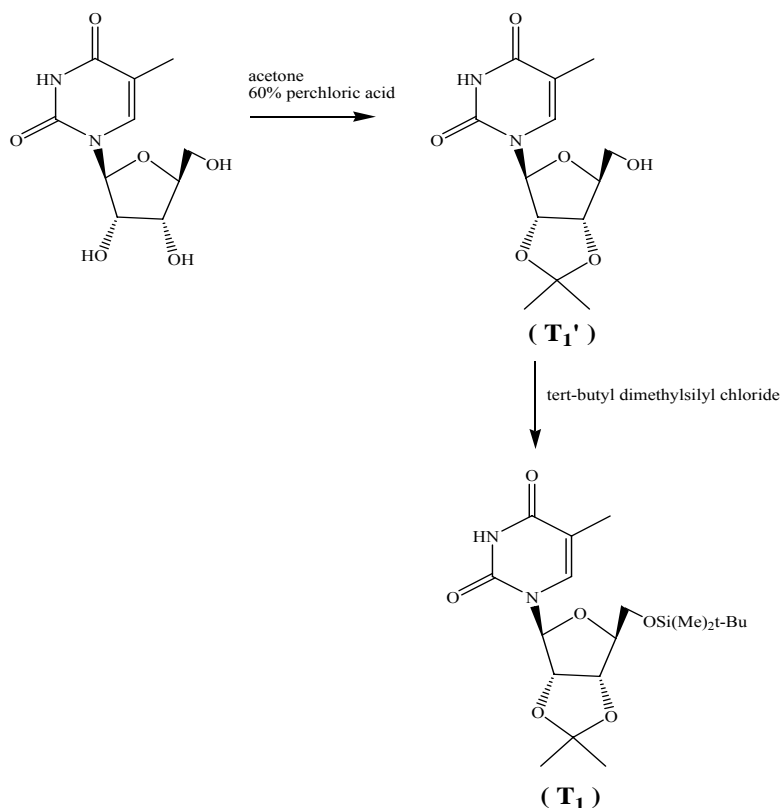

Synthesis of **T**<sub>1</sub> was achieved according to the similar procedures.<sup>1,2</sup>

The mixture of 5-methyluridine (981 mg, 3.8 mmol), 60% perchloric acid (0.1 mL) and acetone (40 mL) was stirred at room temperature for 3 h. To it was added ammonium hydroxide till the solution was neutral. Chromatography (97:3 CH<sub>2</sub>Cl<sub>2</sub>:MeOH) gave the product as a white solid (0.95 g). ESI-MS (**T**<sub>1</sub>' + Na<sup>+</sup>): 321.2 (base peak) (calcd. 321.1). The solid product was mixed with imidazole (435 mg, 6.4 mmol) in methylene chloride (35 mL), and to it was added tert-butyl dimethylsilyl chloride (722 g, 4.8 mmol). The reaction mixture was stirred at room temperature for 12 h, after which time TLC analysis indicated the reaction was complete. The reaction mixture was washed with 0.01 N HCl, saturated NaHCO<sub>3</sub>, and saturated NaCl. Chromatography (98:2 CH<sub>2</sub>Cl<sub>2</sub>:MeOH) gave **T**<sub>1</sub> as a colorless soft matter (1.136 g, 2.8 mmol) and the yield was 72% based on the starting material (5-methyluridine). <sup>1</sup>H NMR (500 MHz, CDCl<sub>3</sub>) δ 9.64 (s, 1 H, H3), 7.29 (s, 1 H, H6), 5.91 (d, 1 H, J = 2.46 Hz, H1'), 4.75 (m, 1 H, J = 3.10, 6.62 Hz, H2'), 4.73 (m, 1 H, J = 2.99, 6.20 Hz, H3'), 4.25 (m, 1 H, J = 2.89 Hz, H4'), 3.90 (dd, 1 H, J = 2.67, 11.43 Hz, H5'), 3.80 (dd, 1 H, J = 3.53, 11.43 Hz, H5''), 1.90 (s, 3 H, CH<sub>3</sub>), 1.58 (s, 3 H, CH<sub>3</sub>), 1.34 (s, 3 H, CH<sub>3</sub>), 0.90 (s, 9 H, t-Bu), 0.0864 (s, 3 H, Si(CH<sub>3</sub>)), 0.07956 (s, 3 H, Si(CH<sub>3</sub>)). <sup>13</sup>C NMR (500 MHz, CDCl<sub>3</sub>) δ 164.58, 150.80, 136.81, 114.60, 111.16, 92.27, 86.55, 85.10, 80.78, 63.71, 27.66, 26.30, 25.77, 18.77, 12.87, -4.94, -5.024.

Anal. Calcd for C<sub>19</sub>H<sub>32</sub>N<sub>2</sub>O<sub>6</sub>Si. C, 55.32; H, 7.82; N, 6.79. Found: C, 54.95; H, 7.96; N, 6.65.

## References

[1] A. Hampton, *J. Am. Chem. Soc.*, 1961, **83**, 3640-3645.

- [2] S. L. Forman, J. C. Fetting, S. Pieraccini, G. Gottarelli and J. T. Davis, *J. Am. Chem. Soc.*, 2000, **122**, 4060-4067.

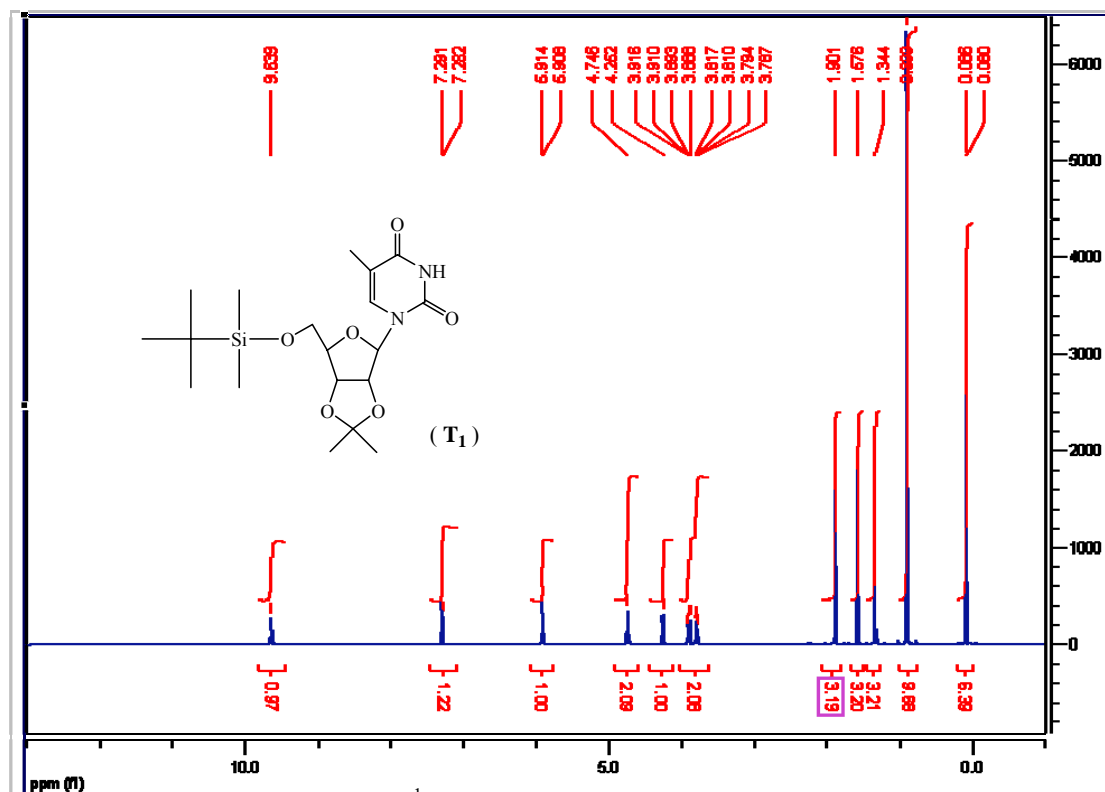

Figure S1.  $^1\text{H}$  NMR spectrum of  $T_1$  in  $\text{CDCl}_3$  at 298 K

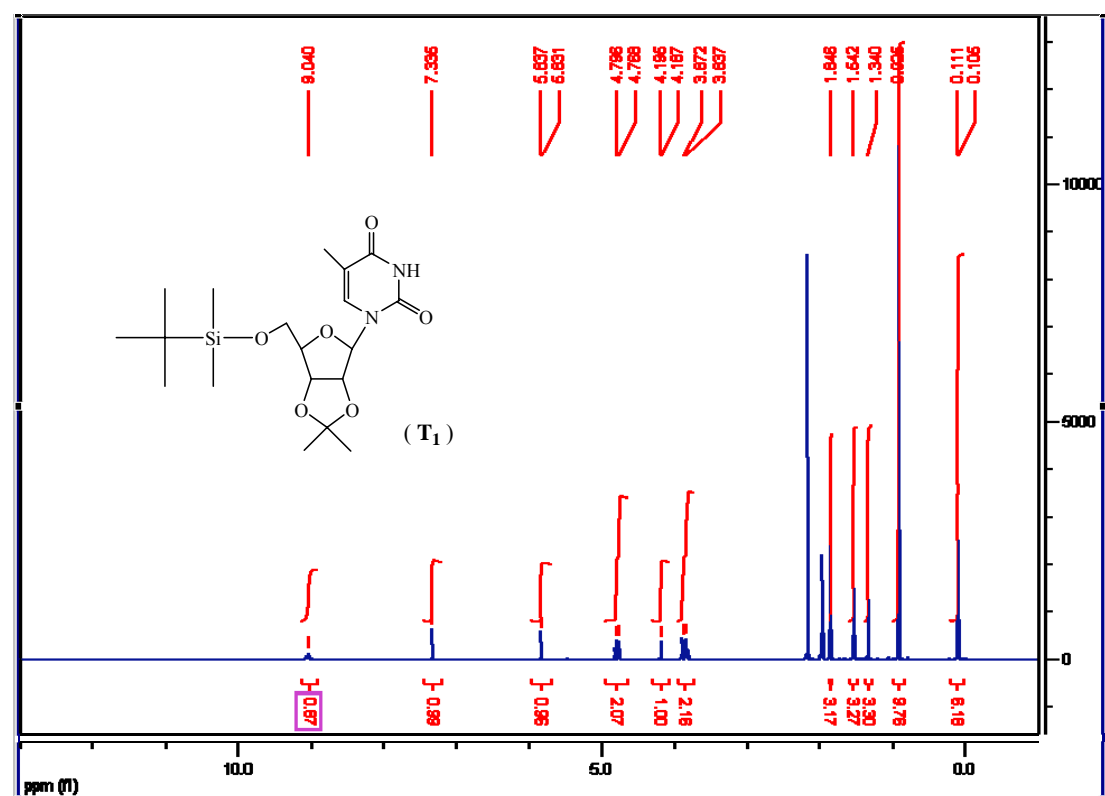

Figure S2.  $^1\text{H}$  NMR spectrum of  $T_1$  in  $\text{CD}_3\text{CN}$  at 298 K

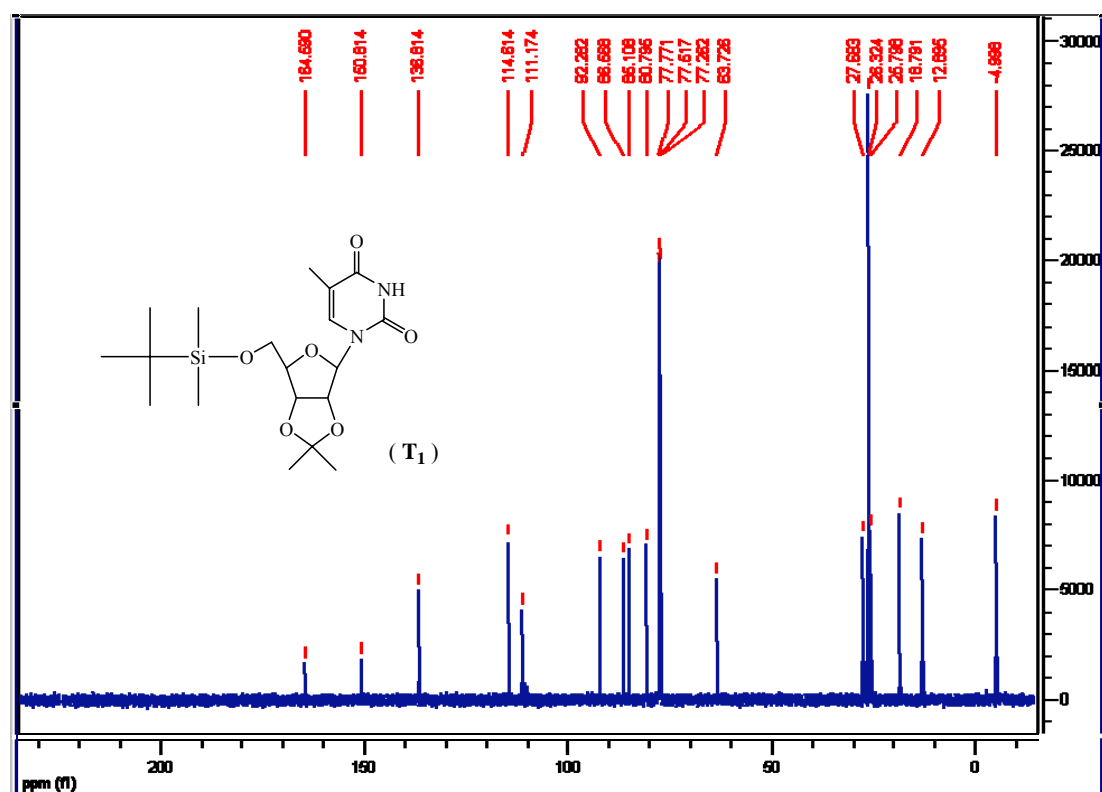

Figure S3. <sup>13</sup>C NMR spectrum of **T<sub>1</sub>** in CDCl<sub>3</sub> at 298 K

## Synthesis of **T<sub>2</sub>**

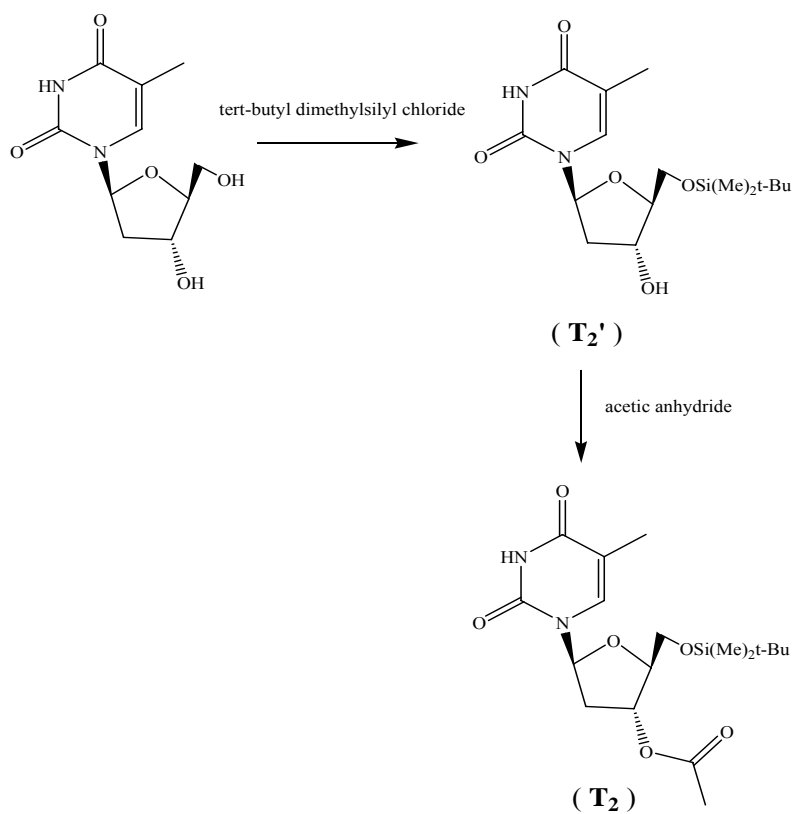

Synthesis of **T<sub>2</sub>** was achieved according to the similar procedures.<sup>1</sup>

#### Synthesis of **T<sub>2</sub>'**

To a suspension of thymidine (968 g, 4 mmol) and imidazole (544 mg, 8 mmol) in methylene chloride (50 mL) was added tert-butyl dimethylsilyl chloride (602 g, 4 mmol). The reaction mixture was stirred at room temperature for 24 h, after which time TLC analysis indicated the reaction was complete. The reaction mixture was washed with 0.01 N HCl, saturated NaHCO<sub>3</sub>, and saturated NaCl. Chromatography (25:1 CH<sub>2</sub>Cl<sub>2</sub>:CH<sub>3</sub>OH) gave **T<sub>2</sub>'** as a colorless solid (345 mg, 24.2%). M.p.: 196-197 °C. ESI-MS (**T<sub>2</sub>'**+Na<sup>+</sup>) 379.3 (base peak) (calcd. 379.2). <sup>1</sup>H NMR (400 MHz, CDCl<sub>3</sub>) δ 9.57 (s, 1 H, H3), 7.54 (m, 1 H, J = 1.18 Hz, H6), 6.39 (dd, 1 H, J = 5.68, 8.07 Hz, H1'), 4.44 (d, 1 H, J = 5.50 Hz), 4.06 (m, 1 H, J = 2.02 Hz), 3.87 (m, 2 H, J = 2.02, 11.37 Hz), 3.25 (s, broad, OH), 2.38 (m, 1 H, J = 5.87, 13.39 Hz), 2.07 (m, 1 H, J = 6.05, 8.25 Hz), 1.90 (s, 3 H, CH<sub>3</sub>), 0.90 (s, 9 H, t-Bu), 0.10 (d, 6 H, J = 2.93 Hz, Si(CH<sub>3</sub>)<sub>2</sub>). <sup>13</sup>C NMR (400 MHz, CDCl<sub>3</sub>) δ 164.2, 150.8, 135.7, 111.1, 87.5, 85.2, 72.7, 63.8, 41.3, 26.1, 18.5, 12.7, 0.1, -5.2, -5.3.

Anal. Calcd for C<sub>16</sub>H<sub>28</sub>N<sub>2</sub>O<sub>5</sub>Si: C, 53.91; H, 7.92; N, 7.86. Found: C, 54.41; H, 7.95; N, 7.89.

#### Synthesis of **T<sub>2</sub>**

The mixture of **T<sub>2</sub>'** (178 mg, 0.5 mmol), acetic anhydride (10 mL) and pyridine (1 mL) was stirred at room temperature for 15 h. To it was added water (50 mL) and the resultant suspension was filtered. Chromatography (98:2 CH<sub>2</sub>Cl<sub>2</sub>:CH<sub>3</sub>OH) gave **T<sub>2</sub>** as a white solid (130 mg, 65%). M.p.: 141-142 °C. <sup>1</sup>H NMR (500 MHz, CDCl<sub>3</sub>) δ 9.36 (s, 1 H, H3), 7.55 (m, 1 H, J = 1.18 Hz, H6), 6.38 (dd, 1 H, J = 5.24, 9.30 Hz, H1'), 5.25 (d, 1 H, J = 5.98 Hz, H3'), 4.10 (m, 1 H, J = 1.39 Hz, H4'), 3.92 (m, 2 H, J = 1.82 Hz, H5', H5''), 2.41 (dd, 1 H, J = 5.24, 13.68 Hz, H2'), 2.12 (m, 1 H, H2''), 2.11 (s, 3 H, CH<sub>3</sub>), 1.93 (s, 3 H, CH<sub>3</sub>), 0.94 (s, 9 H, t-Bu), 0.14 (s, 6 H, Si(CH<sub>3</sub>)<sub>2</sub>). <sup>13</sup>C NMR (500 MHz, CDCl<sub>3</sub>) δ 171.04, 164.25, 150.98, 135.41, 111.68, 85.77, 85.08, 75.81, 64.00, 38.40, 26.32, 21.42, 18.73, 12.91, -4.986, -5.093.

Anal. Calcd for C<sub>18</sub>H<sub>30</sub>N<sub>2</sub>O<sub>6</sub>Si: C, 54.25; H, 7.59; N, 7.03. Found: C, 54.34; H, 7.81; N, 6.90.

#### Reference

[1] S. Wendicke, S. Warnecke and C. Meier, *Angew. Chem. Int. Ed.*, 2008, **47**, 1500-1502.

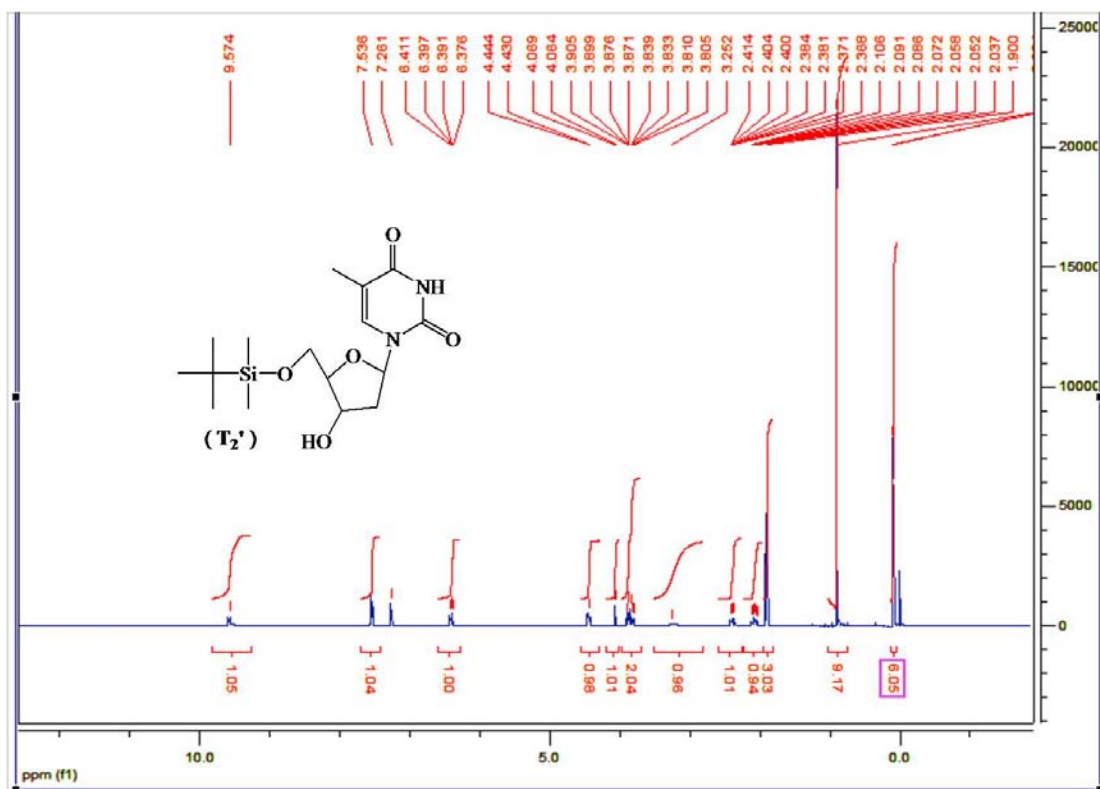

Figure S4.  $^1H$  NMR spectrum of  $T_2'$  in  $CDCl_3$  at 298 K

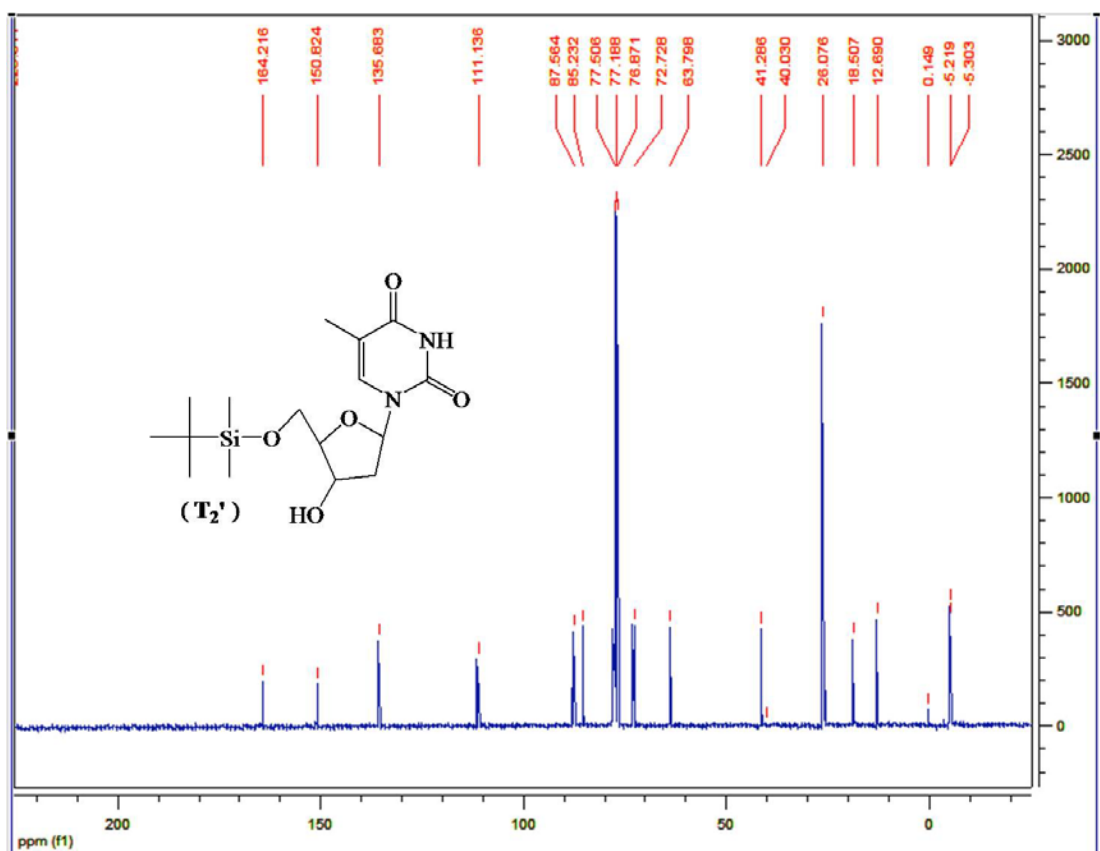

Figure S5.  $^{13}C$  NMR spectrum of  $T_2'$  in  $CDCl_3$  at 298 K

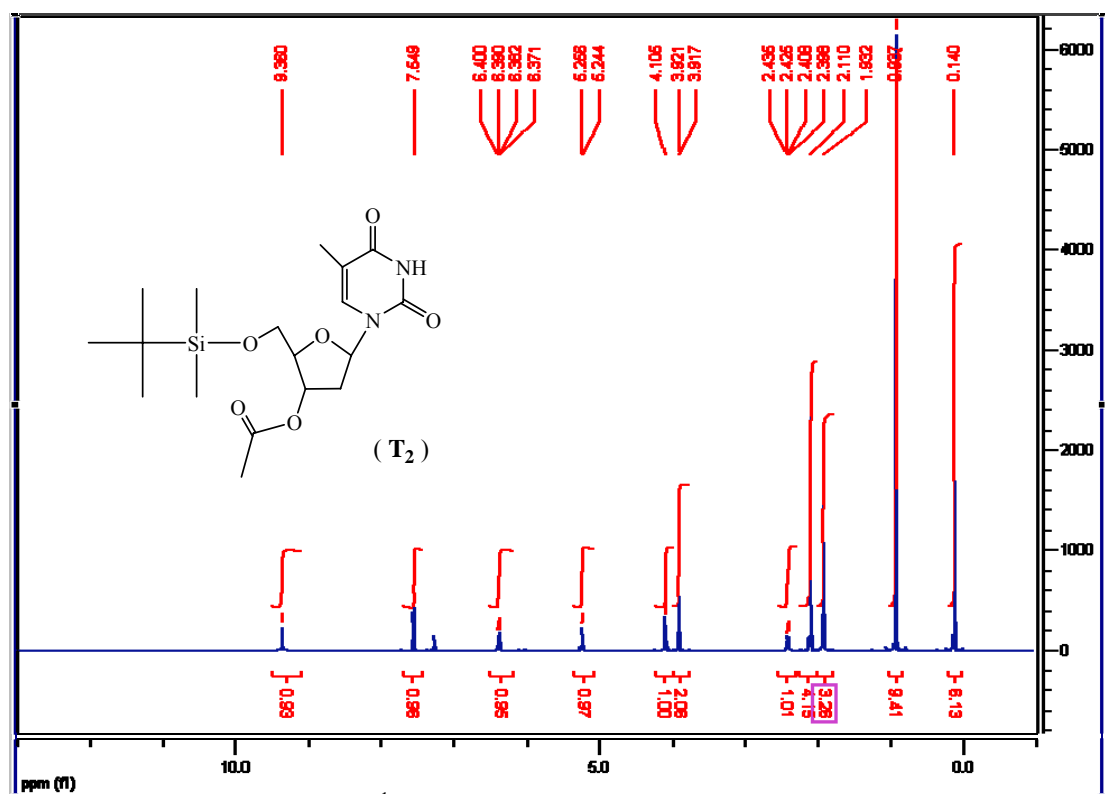

Figure S6.  $^1H$  NMR spectrum of  $T_2$  in  $CDCl_3$  at 298 K

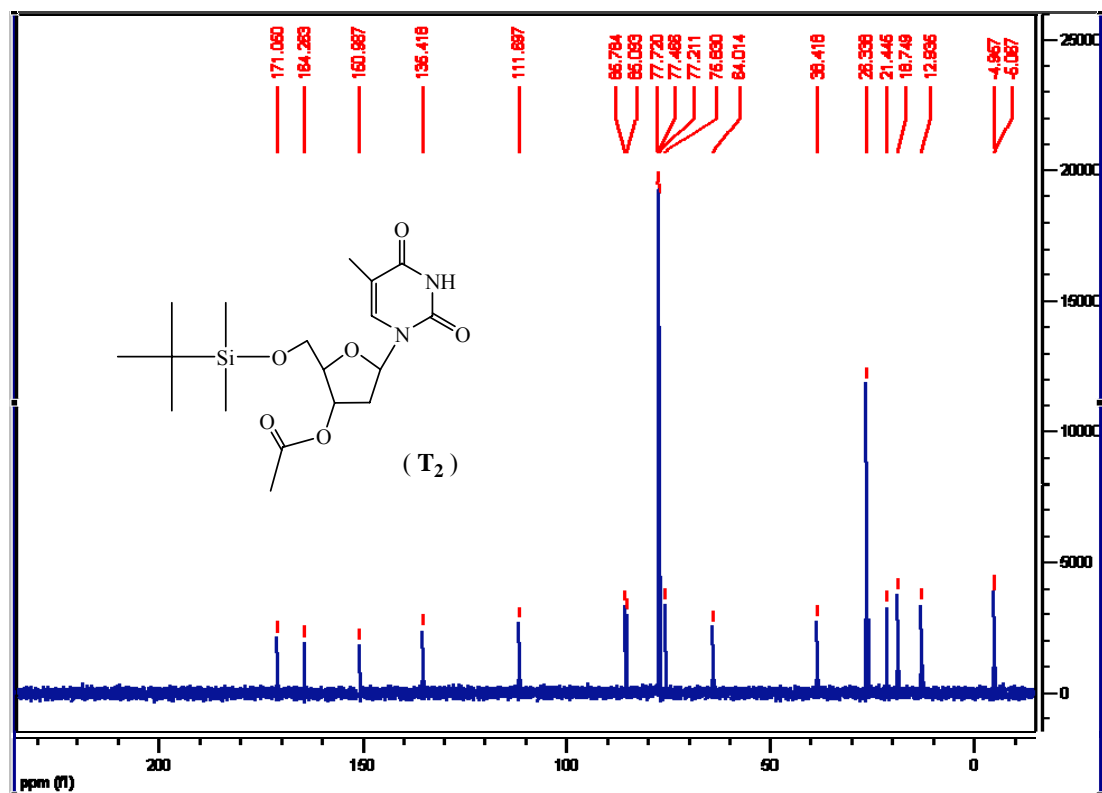

Figure S7.  $^{13}C$  NMR spectrum of  $T_2$  in  $CDCl_3$  at 298 K



## Synthesis of **T<sub>3</sub>**

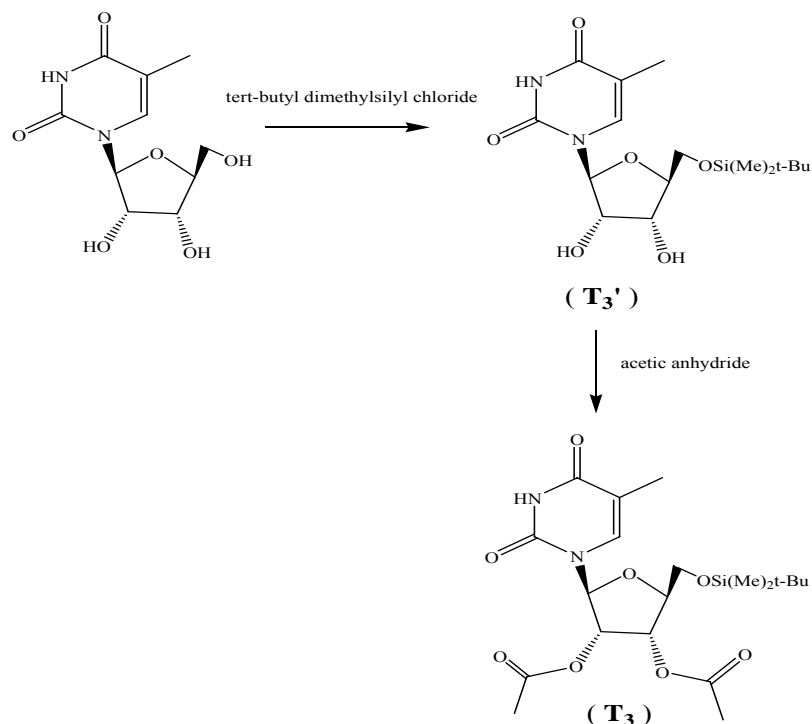

Synthesis of **T<sub>3</sub>** was achieved according to the similar procedures.<sup>1</sup>

## Synthesis of **T<sub>3</sub>'**

To a suspension of 5-methyluridine (1032 mg, 4 mmol) and imidazole (544 mg, 8 mmol) in methylene chloride (50 mL) was added tert-butyl dimethylsilyl chloride (602 g, 4 mmol). The reaction mixture was stirred at room temperature for 48 h, after which time TLC analysis indicated the reaction was complete. The reaction mixture was washed with 0.01 N HCl, saturated NaHCO<sub>3</sub>, and saturated NaCl. Chromatography (25:1 CH<sub>2</sub>Cl<sub>2</sub>:MeOH) gave **T<sub>3</sub>'** as a colorless solid (744 mg, 50 %). M.p.: 210-211 °C. ESI-MS (**T<sub>3</sub>'**+Na<sup>+</sup>) 395.3 (calcd. 395.2). <sup>1</sup>H NMR (400 MHz, CDCl<sub>3</sub>) δ 9.54 (s, 1 H, H3), 7.59 (m, 1 H, J = 1.10 Hz, H6), 5.86 (d, 1 H, J = 3.85 Hz, H1'), 4.23 (m, 3 H, H2', H3', H4'), 3.95 (dd, 2 H, J = 10.82, 56.49 Hz, H5', H5''), 1.90 (m, 3 H, J = 0.73 Hz, CH<sub>3</sub>), 0.90 (s, 9 H, t-Bu), 0.10 (s, 3 H, Si(CH<sub>3</sub>)<sub>2</sub>). <sup>13</sup>C NMR (400 Hz, CDCl<sub>3</sub>) δ 164.0, 151.6, 135.7, 110.7, 90.8, 86.3, 71.3, 63.0, 26.0, 18.5, 12.7, 0.1, -5.3.

Anal. Calcd for C<sub>16</sub>H<sub>28</sub>N<sub>2</sub>O<sub>6</sub>Si: C, 51.59; H, 7.58; N, 7.52. Found: C, 52.05; H, 7.61; N, 7.56.

## Synthesis of **T<sub>3</sub>**

The mixture of **T<sub>3</sub>'** (186 mg, 0.5 mmol), acetic anhydride (10 mL) and pyridine (1 mL) was stirred at room temperature for 15 h. To it was added water (50 mL) and the resultant suspension was filtered. Chromatography (98:2 CH<sub>2</sub>Cl<sub>2</sub>:CH<sub>3</sub>OH) gave **T<sub>3</sub>** as a white solid (142 mg, 62%).

M.p.: 133-134 °C. ESI-MS ( $T_1'^+Na^+$ ) 321.2 (calcd. 321.1).  $^1H$  NMR (500 MHz,  $CDCl_3$ )  $\delta$  9.41 (s, 1 H, H3), 7.49 (m, 1 H,  $J = 1.07$  Hz, H6), 6.33 (d, 1 H,  $J = 7.69$  Hz, H1'), 5.35 (dd, 1 H,  $J = 1.50$ , 5.45 Hz, H2'), 5.28 (dd, 1 H,  $J = 5.56$ , 7.69 Hz, H3'), 4.19 (m, 1 H,  $J = 1.71$  Hz, H4'), 3.92 (dd, 1 H,  $J = 1.71$ , 11.43 Hz, H5'), 3.86 (dd, 1 H,  $J = 1.82$ , 11.54 Hz, H5''), 2.15 (s, 3 H,  $CH_3$ ), 2.07 (s, 3 H,  $CH_3$ ), 1.93 (s, 3 H,  $CH_3$ ), 0.97 (s, 9 H, t-Bu), 0.17487 (s, 3 H,  $Si(CH_3)$ ), 0.16696 (s, 3 H,  $Si(CH_3)$ ).  $^{13}C$  NMR (500 Hz,  $CDCl_3$ )  $\delta$  170.46, 170.15, 164.10, 151.30, 135.06, 112.33, 84.87, 84.09, 73.13, 72.20, 63.68, 26.32, 21.15, 20.83, 18.75, 12.87, -5.054, -5.093.

Anal. Calcd for  $C_{20}H_{32}N_2O_8Si$ : C, 52.61; H, 7.06; N, 6.14. Found: C, 52.82; H, 7.11; N, 6.29.

## Reference

[1] S. Wendicke, S. Warnecke and C. Meier, *Angew. Chem. Int. Ed.*, 2008, **47**, 1500-1502.

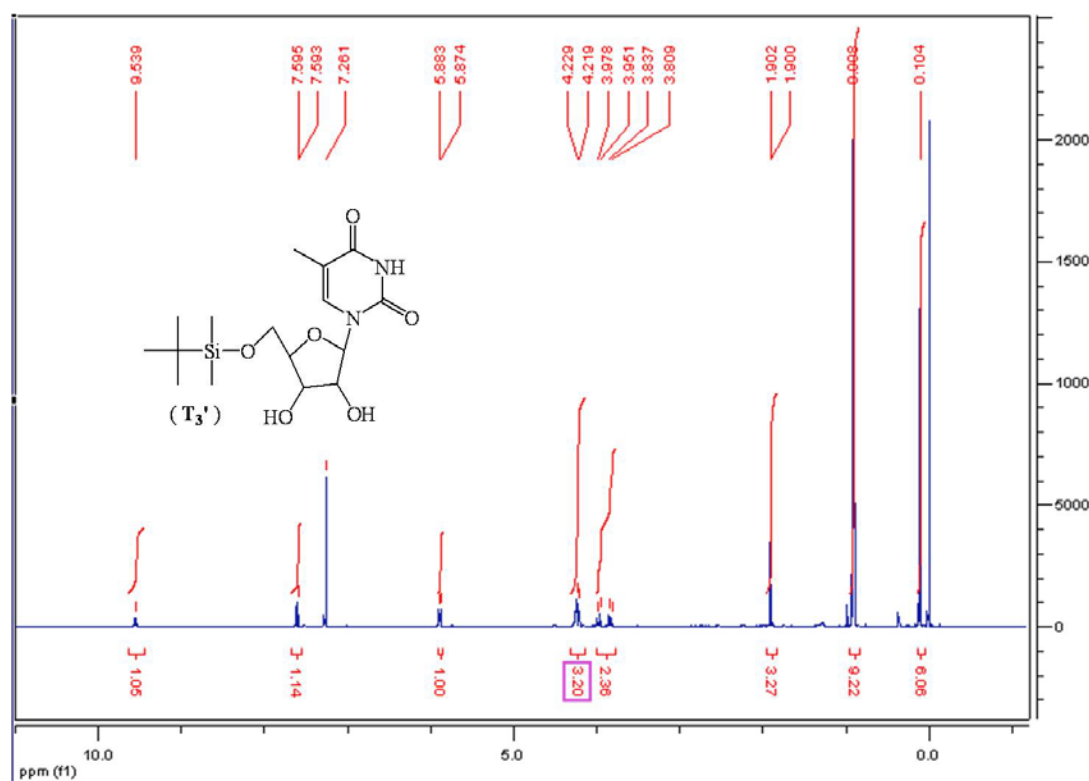

Figure S8.  $^1H$  NMR spectrum of  $T_3'$  in  $CDCl_3$  at 298 K

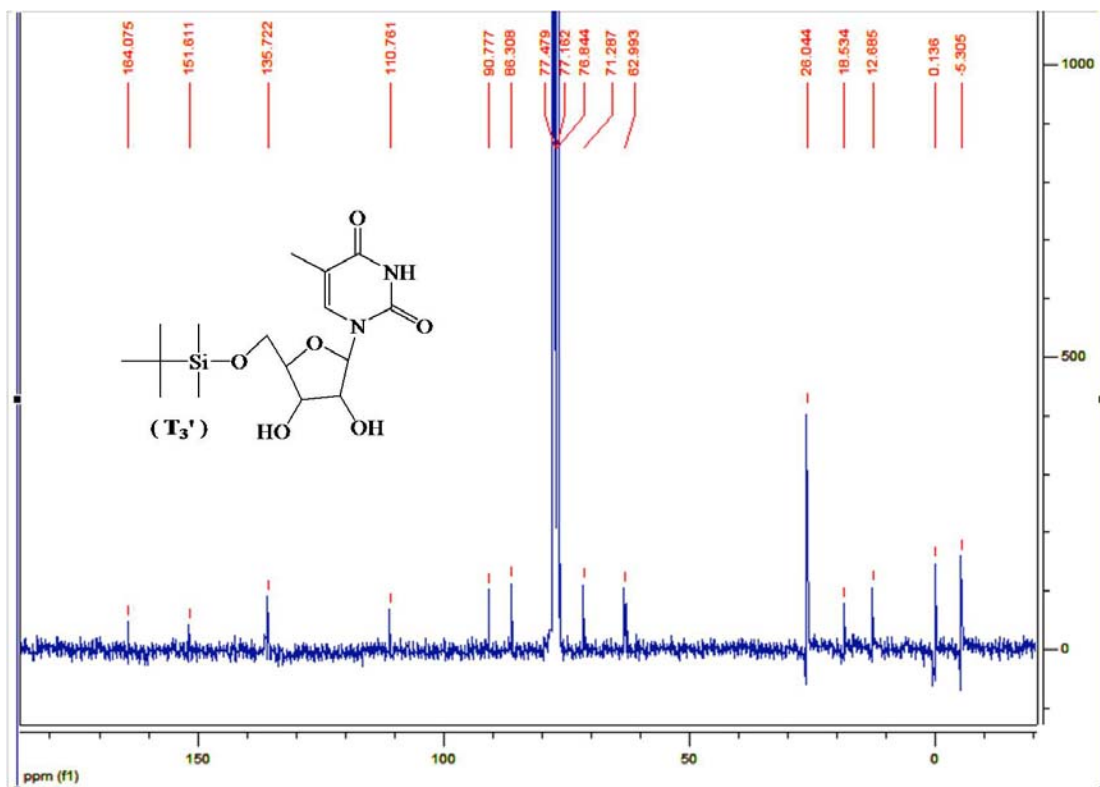

Figure S9.  $^{13}\text{C}$  NMR spectrum of  $T_3'$  in  $\text{CDCl}_3$  at 298 K

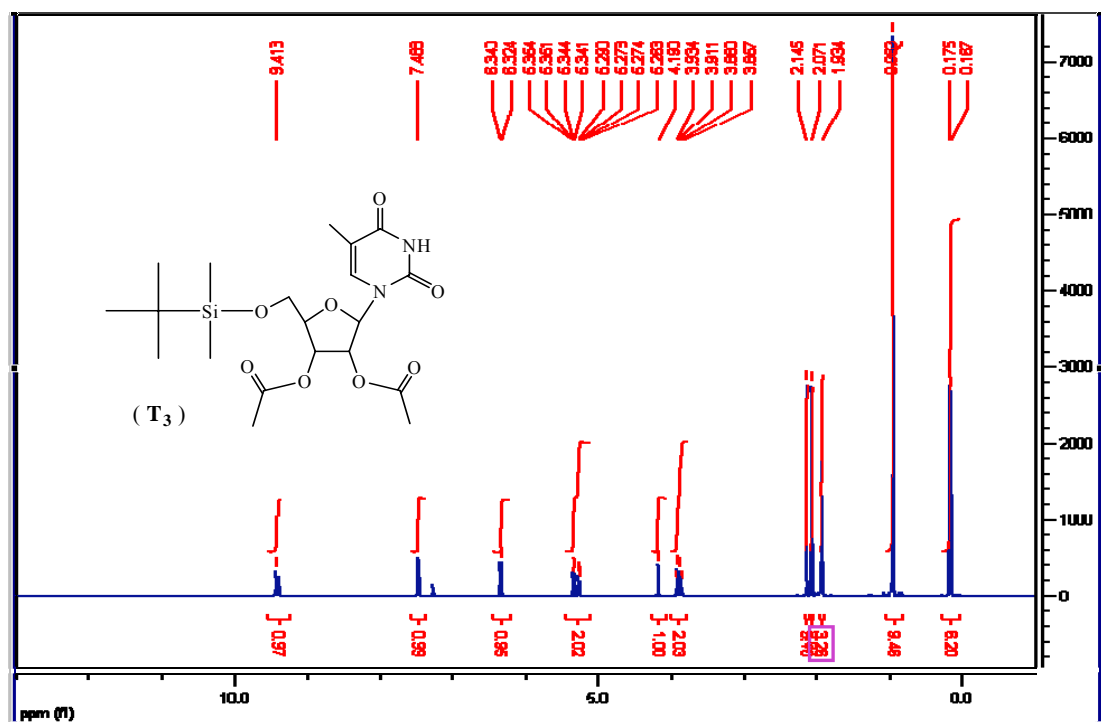

Figure S10.  $^1\text{H}$  NMR spectrum of  $T_3$  in  $\text{CDCl}_3$  at 298 K

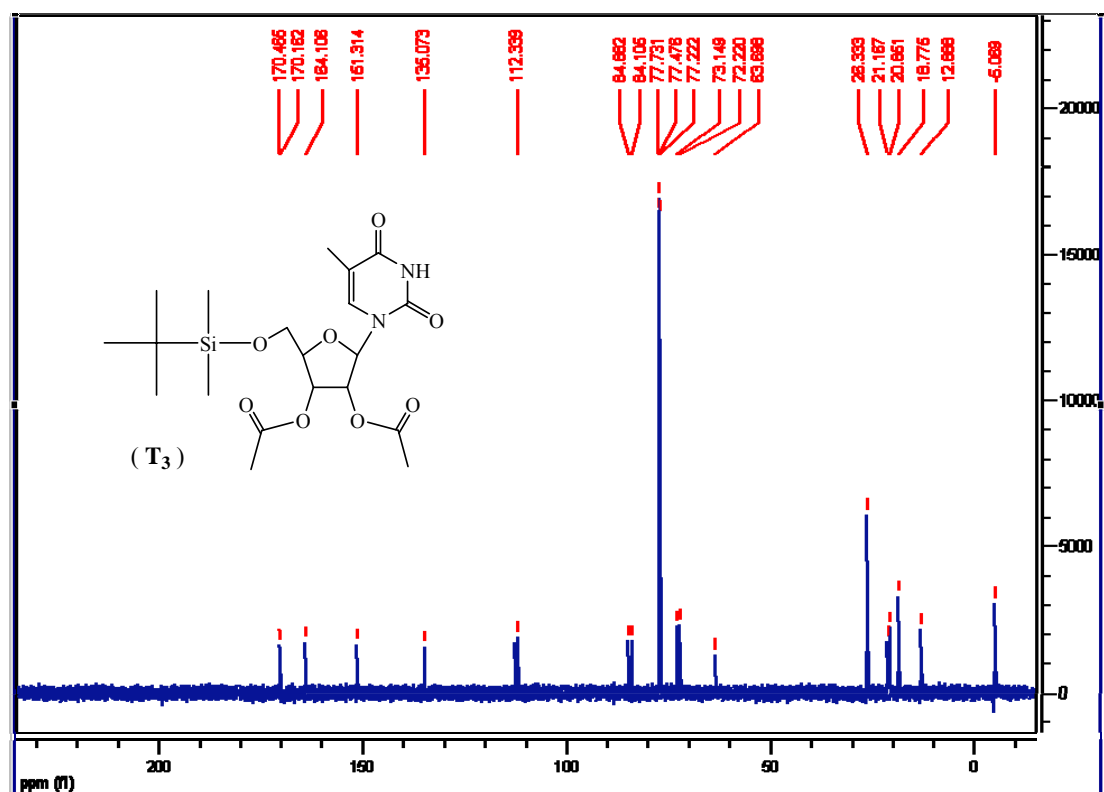

Figure S11. <sup>13</sup>C NMR spectrum of **T<sub>3</sub>** in CDCl<sub>3</sub> at 298 K

## X-ray Crystallographic Analysis for **T<sub>2</sub>**

A crystal of **T<sub>2</sub>** (colorless, block-shaped, size 0.5 x 0.5 x 0.2mm) was mounted on a glass fiber with grease very quickly. Data collection was performed on a Bruker SMART CCD 1000 X-ray diffractometer with graphite-monochromated Mo K radiation ( $\lambda = 0.71073 \text{ \AA}$ ), operating at 50 kV and 30 mA over 2 ranges of  $2.60 \sim 52.00^\circ$  at  $-93^\circ\text{C}$  controlled with Crysostream Controller 700. No significant decay was observed during the data collection.

Data were processed on a Pentium PC using the Bruker AXS Windows NT software package (version 5.10).<sup>1</sup> Neutral atom scattering factors were taken from Cromer and Waber.<sup>2</sup> The raw intensity data were converted (including corrections for scan speed, background, and Lorentz and polarization effects) to structure amplitudes and their esd's using the program SAINT-Plus, which corrects for  $L_p$  and decay. Empirical absorption corrections were applied using program SADABS. The structure is solved and refined by using SHELXTL. The crystal is orthorhombic space group  $C22_1$ , based on the systematic absences,  $E$  statistics and successful refinement of the structure. The structure was solved by direct methods. Full-matrix least-square refinements minimizing the function  $\sum w (F_o^2 - F_c^2)^2$  were applied to the compound. All non-hydrogen atoms were refined anisotropically. Most of the hydrogen atoms were located gradually from the difference Fourier

map and their contributions were included in the structure factor calculations. Convergence to final  $R_1 = 0.0266$  and  $wR_2 = 0.0660$  by using 3647 ( $I > 2\sigma(I)$ ) independent reflections and 340 parameters were achieved,<sup>3</sup> with the largest residual peak and hole to be 0.177 and  $-0.167 \text{ e}/\text{\AA}^3$ , respectively.

- 
- [1] Bruker AXS Crystal Structure Analysis Package, Version 5.10 (SMART NT (Version 5.053), SAINT-Plus (Version 6.01), SHELXTL (Version 5.1)); Bruker AXS Inc.: Madison, WI, 1999.
- [2] D. T. Cromer and J. T. Waber, *Interactional Tables for X-ray Crystallography*; Kynoch Press: Birmingham, UK, 1974; Vol. 4, Table 2.2 A.
- [3]  $R_1 = \sum ||Fo| - |Fc|| / \sum |Fo|$   
 $wR_2 = \{\sum [w(Fo^2 - Fc^2)^2] / \sum [w(Fo^2)^2]\}^{1/2}$   
 $(w = 1 / [\sigma^2(Fo^2) + (0.0447P)^2], \text{ where } P = [\text{Max}(Fo^2, 0) + 2Fc^2] / 3)$

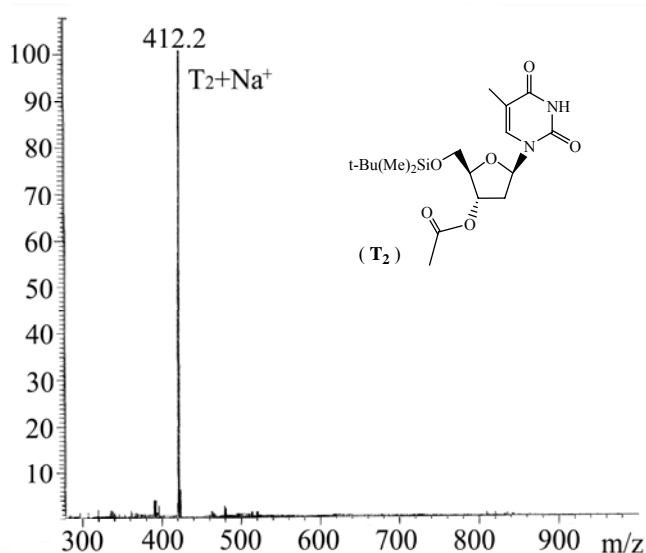

Figure S12. ESI-MS of  $T_2$ -NaCl in acetonitrile

Table S1. Signal assignment of TOF-ESI-MS for a mixture of **T**<sub>1</sub> and alkali metal chloride in acetonitrile

| TOF-ESI-MS peaks                                                                                    | Experimental value | Calculated value |
|-----------------------------------------------------------------------------------------------------|--------------------|------------------|
| <b>T</b> <sub>1</sub> +Li <sup>+</sup>                                                              | 419.6              | 419.2            |
| 2 <b>T</b> <sub>1</sub> +Li <sup>+</sup>                                                            | 831.2              | 831.4            |
| 3 <b>T</b> <sub>1</sub> +Li <sup>+</sup>                                                            | 1242.6             | 1243.6           |
| <b>T</b> <sub>1</sub> +Na <sup>+</sup>                                                              | 435.6              | 435.2            |
| 2 <b>T</b> <sub>1</sub> +Na <sup>+</sup>                                                            | 847.1              | 847.4            |
| 3 <b>T</b> <sub>1</sub> +Na <sup>+</sup>                                                            | 1258.4             | 1259.6           |
| 4 <b>T</b> <sub>1</sub> +Na <sup>+</sup> ( <b>T</b> <sub>1</sub> -tetramer)                         | 1670.7             | 1672.8           |
| [4 <b>T</b> <sub>1</sub> +Na <sup>+</sup> ] <sub>2</sub> (dimeric <b>T</b> <sub>1</sub> -tetramers) | 1670.7             | 1672.8           |
| <b>T</b> <sub>1</sub> +K <sup>+</sup>                                                               | 451.2              | 451.2            |
| 2 <b>T</b> <sub>1</sub> +K <sup>+</sup>                                                             | 863.1              | 863.4            |
| 3 <b>T</b> <sub>1</sub> +K <sup>+</sup>                                                             | 1274.4             | 1275.6           |
| 4 <b>T</b> <sub>1</sub> +K <sup>+</sup> ( <b>T</b> <sub>1</sub> -tetramer)                          | 1686.7             | 1688.8           |
| [4 <b>T</b> <sub>1</sub> +K <sup>+</sup> ] <sub>2</sub> (dimeric <b>T</b> <sub>1</sub> -tetramers)  | 1686.7             | 1688.8           |
| <b>T</b> <sub>1</sub> +Rb <sup>+</sup>                                                              | 497.4              | 497.1            |
| 2 <b>T</b> <sub>1</sub> +Rb <sup>+</sup>                                                            | 909.0              | 909.3            |
| [2 <b>T</b> <sub>1</sub> +Rb <sup>+</sup> ]+[3 <b>T</b> <sub>1</sub> +Rb <sup>+</sup> ]             | 1115.7             | 1116.4           |
| 3 <b>T</b> <sub>1</sub> +Rb <sup>+</sup>                                                            | 1321.3             | 1322.5           |
| [3 <b>T</b> <sub>1</sub> +Rb <sup>+</sup> ]+[4 <b>T</b> <sub>1</sub> +Rb <sup>+</sup> ]             | 1527.5             | 1529.1           |
| 4 <b>T</b> <sub>1</sub> +Rb <sup>+</sup> ( <b>T</b> <sub>1</sub> -tetramer)                         | 1733.6             | 1735.7           |
| [4 <b>T</b> <sub>1</sub> +Rb <sup>+</sup> ] <sub>2</sub> (dimeric <b>T</b> <sub>1</sub> -tetramers) | 1733.1             | 1735.2           |
| [4 <b>T</b> <sub>1</sub> +Rb <sup>+</sup> ]+[5 <b>T</b> <sub>1</sub> +Rb <sup>+</sup> ]             | 1939.3             | 1941.8           |
| 5 <b>T</b> <sub>1</sub> +Rb <sup>+</sup> ( <b>T</b> <sub>1</sub> -pentamer)                         | 2144.9             | 2147.9           |
| [5 <b>T</b> <sub>1</sub> +Rb <sup>+</sup> ] <sub>2</sub> (dimeric <b>T</b> <sub>1</sub> -pentamers) | 2144.9             | 2147.9           |
| <b>T</b> <sub>1</sub> +Cs <sup>+</sup>                                                              | 545.5              | 545.1            |
| 2 <b>T</b> <sub>1</sub> +Cs <sup>+</sup>                                                            | 957.0              | 957.3            |
| [2 <b>T</b> <sub>1</sub> +Cs <sup>+</sup> ]+[3 <b>T</b> <sub>1</sub> +Cs <sup>+</sup> ]             | 1163.3             | 1163.9           |
| 3 <b>T</b> <sub>1</sub> +Cs <sup>+</sup>                                                            | 1368.4             | 1369.5           |
| [3 <b>T</b> <sub>1</sub> +Cs <sup>+</sup> ]+[4 <b>T</b> <sub>1</sub> +Cs <sup>+</sup> ]             | 1575.2             | 1576.4           |
| 4 <b>T</b> <sub>1</sub> +Cs <sup>+</sup> ( <b>T</b> <sub>1</sub> -tetramer)                         | 1780.8             | 1782.7           |
| [4 <b>T</b> <sub>1</sub> +Cs <sup>+</sup> ] <sub>2</sub> (dimeric <b>T</b> <sub>1</sub> -tetramers) | 1780.8             | 1782.7           |
| [4 <b>T</b> <sub>1</sub> +Cs <sup>+</sup> ]+[5 <b>T</b> <sub>1</sub> +Cs <sup>+</sup> ]             | 1987.0             | 1989.3           |
| 5 <b>T</b> <sub>1</sub> +Cs <sup>+</sup> ( <b>T</b> <sub>1</sub> -pentamer)                         | 2192.1             | 2194.9           |
| [5 <b>T</b> <sub>1</sub> +Cs <sup>+</sup> ] <sub>2</sub> (dimeric <b>T</b> <sub>1</sub> -pentamers) | 2192.6             | 2195.4           |

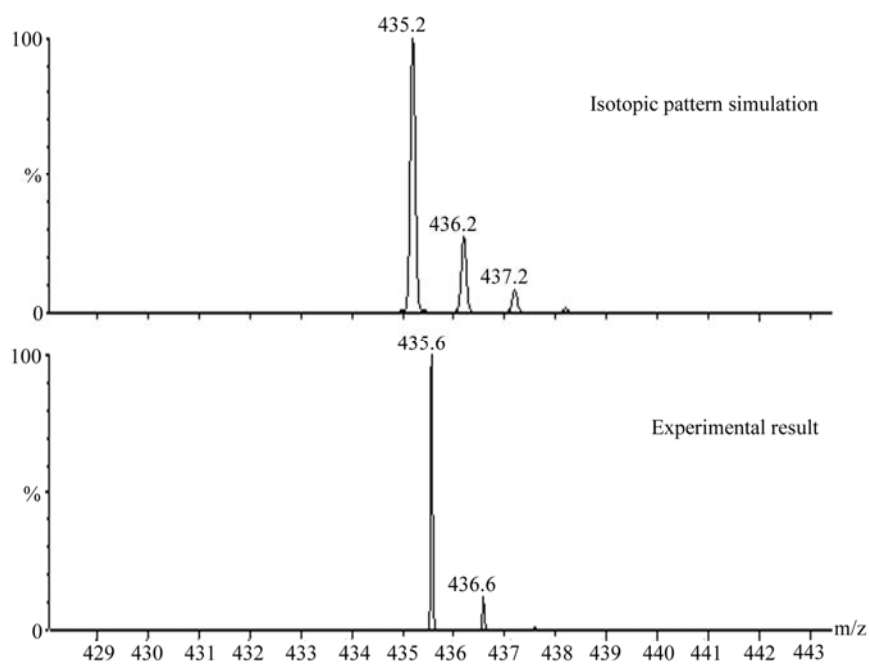

Figure S13. Comparison between experimental result and simulated isotopic pattern for TOF-ESI-MS of  $T_1+Na^+$  ion.

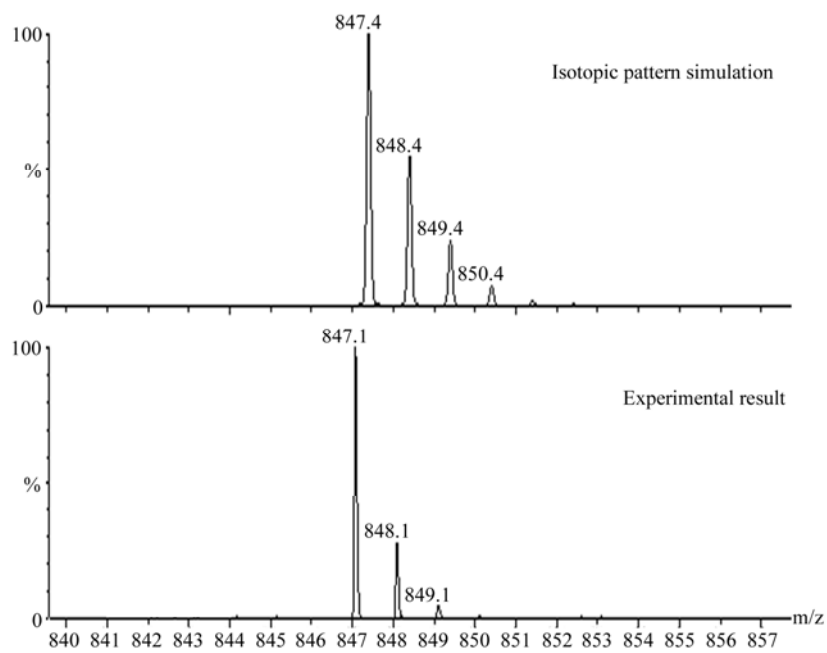

Figure S14. Comparison between experimental result and simulated isotopic pattern for TOF-ESI-MS of  $2T_1+Na^+$  ion.

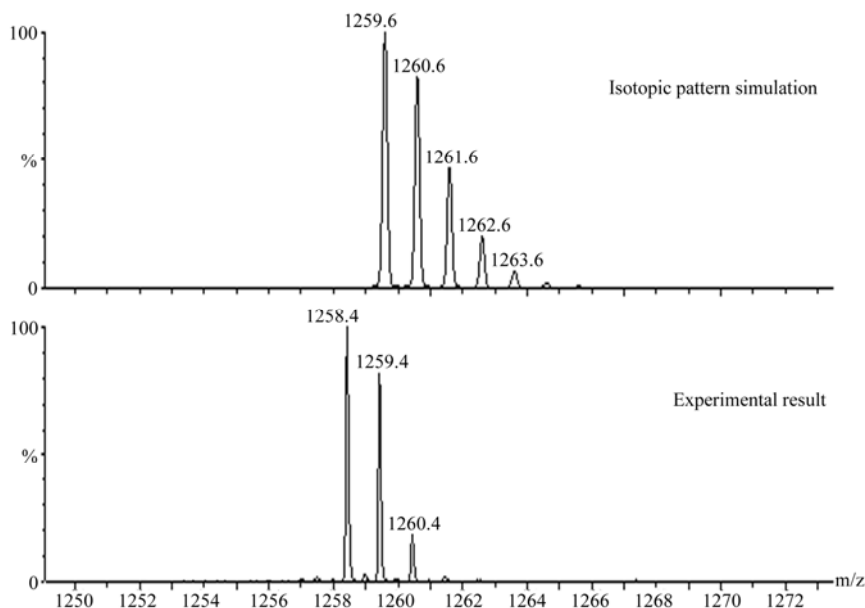

Figure S15. Comparison between experimental result and simulated isotopic pattern for TOF-ESI-MS of  $3\mathbf{T}_1+\text{Na}^+$  ion.

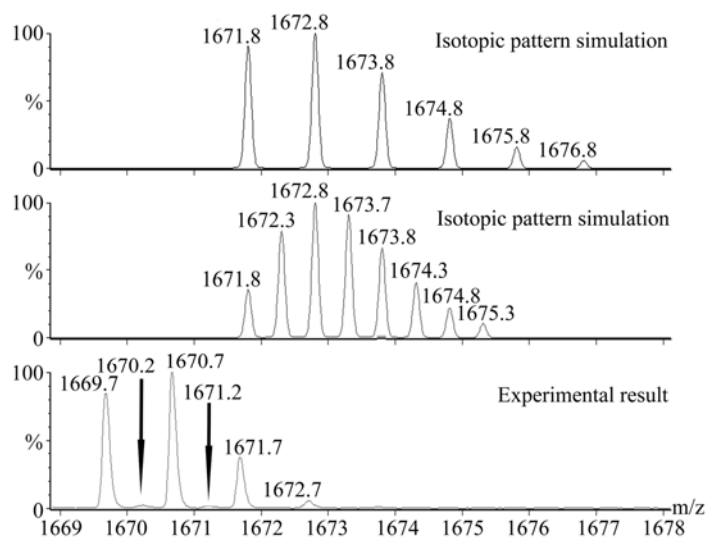

Figure S16. Comparison between experimental results and simulated isotopic patterns for TOF-ESI-MS of  $4\mathbf{T}_1+\text{Na}^+$  monomer ( $\mathbf{T}_1$ -tetramer) and  $4\mathbf{T}_1+\text{Na}^+$  dimer (or dimeric  $\mathbf{T}_1$ -tetramers). Top: isotopic pattern simulation for  $4\mathbf{T}_1+\text{Na}^+$  monomer; Middle: isotopic pattern simulation for  $4\mathbf{T}_1+\text{Na}^+$  dimer; Bottom: experimental results showing a combined signal of major  $4\mathbf{T}_1+\text{Na}^+$  monomer and minor  $4\mathbf{T}_1+\text{Na}^+$  dimer.



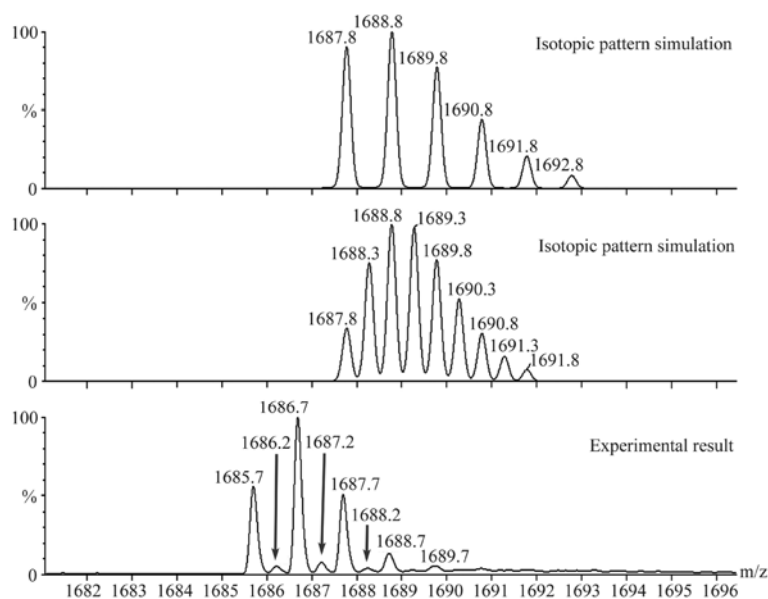

Figure S17. Comparison between experimental results and simulated isotopic patterns for TOF-ESI-MS of  $4\mathbf{T}_1+\mathbf{K}^+$  monomer ( $\mathbf{T}_1$ -tetramer) and  $4\mathbf{T}_1+\mathbf{K}^+$  dimer (or dimeric  $\mathbf{T}_1$ -tetramers). Top: isotopic pattern simulation for  $4\mathbf{T}_1+\mathbf{K}^+$  monomer; Middle: isotopic pattern simulation for  $4\mathbf{T}_1+\mathbf{K}^+$  dimer; Bottom: experimental results showing a combined signal of major  $4\mathbf{T}_1+\mathbf{K}^+$  monomer and minor  $4\mathbf{T}_1+\mathbf{K}^+$  dimer.

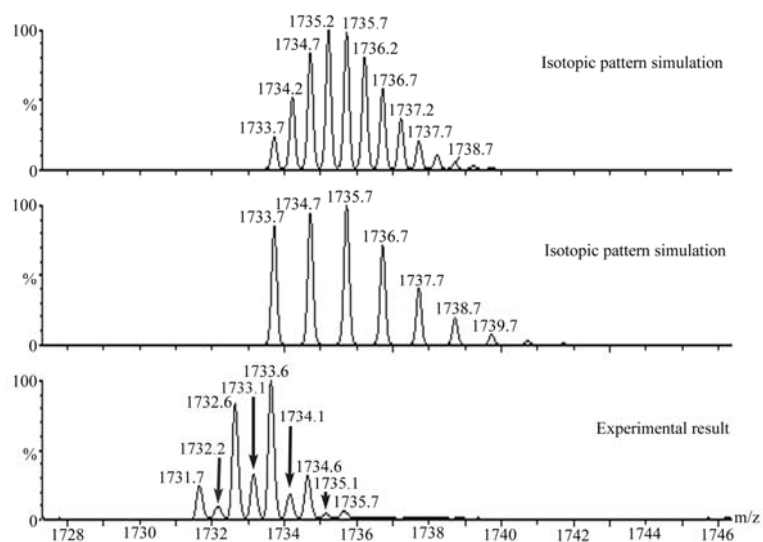

Figure S18. Comparison between experimental results and simulated isotopic patterns for TOF-ESI-MS of  $4\mathbf{T}_1+\mathbf{Rb}^+$  monomer ( $\mathbf{T}_1$ -tetramer) and  $4\mathbf{T}_1+\mathbf{Rb}^+$  dimer (or dimeric  $\mathbf{T}_1$ -tetramers). Top: isotopic pattern simulation for  $4\mathbf{T}_1+\mathbf{Rb}^+$  dimer; Middle: isotopic pattern simulation for  $4\mathbf{T}_1+\mathbf{Rb}^+$  monomer; Bottom: experimental results showing a combined signal of major  $4\mathbf{T}_1+\mathbf{Rb}^+$  monomer and minor  $4\mathbf{T}_1+\mathbf{Rb}^+$  dimer.

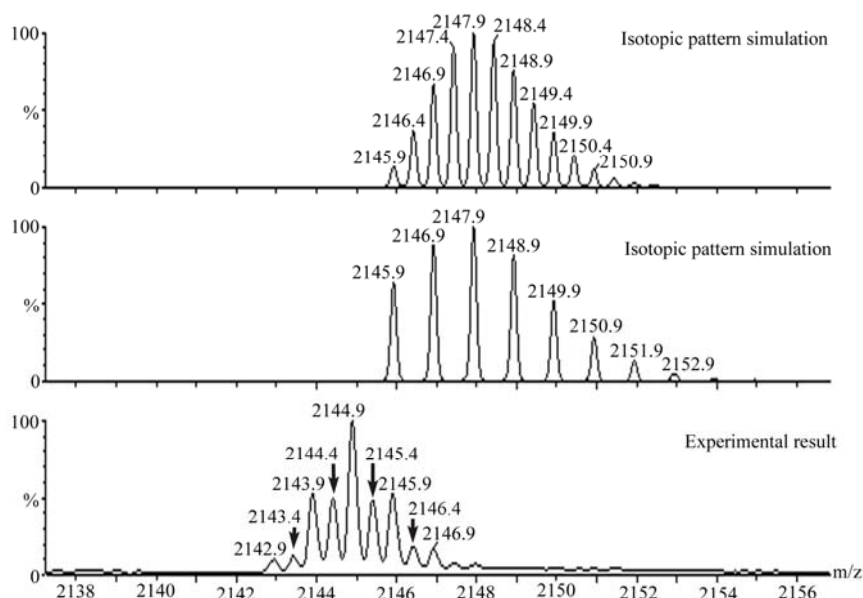

Figure S19. Comparison between experimental results and simulated isotopic patterns for TOF-ESI-MS of  $5\mathbf{T}_1+\text{Rb}^+$  monomer ( $\mathbf{T}_1$ -pentamer) and  $5\mathbf{T}_1+\text{Rb}^+$  dimer (or dimeric  $\mathbf{T}_1$ -pentamers). Top: isotopic pattern simulation for  $5\mathbf{T}_1+\text{Rb}^+$  dimer; Middle: isotopic pattern simulation for  $5\mathbf{T}_1+\text{Rb}^+$  monomer; Bottom: experimental result showing a combined signal of  $5\mathbf{T}_1+\text{Rb}^+$  monomer and  $5\mathbf{T}_1+\text{Rb}^+$  dimer.

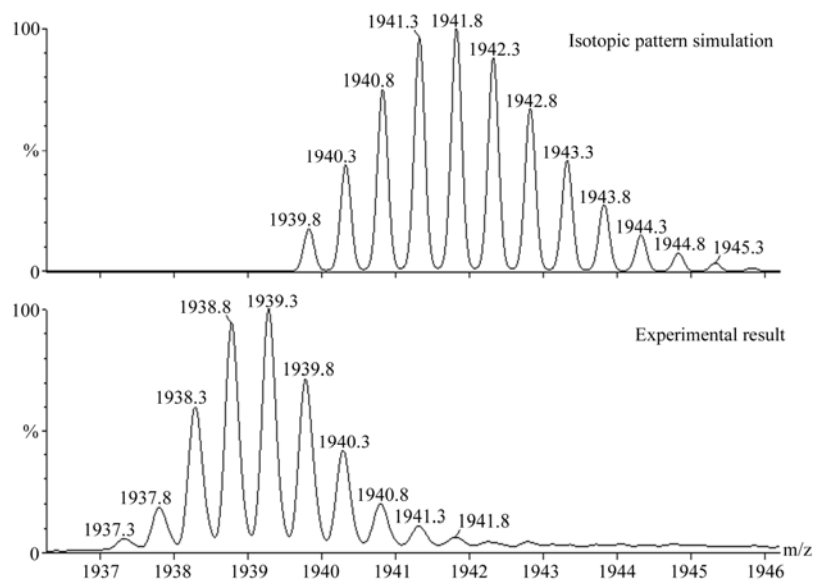

Figure S20. Comparison between experimental result and simulated isotopic pattern for TOF-ESI-MS of  $[4\mathbf{T}_1+\text{Rb}^+]+[5\mathbf{T}_1+\text{Rb}^+]$  ion.

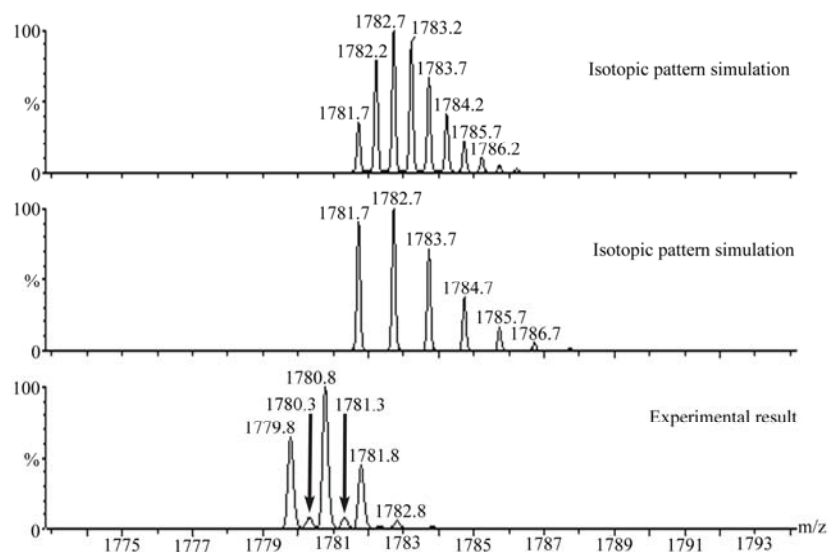

Figure S21. Comparison between experimental results and simulated isotopic patterns for TOF-ESI-MS of  $4\mathbf{T}_1+\text{Cs}^+$  monomer ( $\mathbf{T}_1$ -tetramer) and  $4\mathbf{T}_1+\text{Cs}^+$  dimer (or dimeric  $\mathbf{T}_1$ -tetramers). Top: isotopic pattern simulation for  $4\mathbf{T}_1+\text{Cs}^+$  dimer; Middle: isotopic pattern simulation for  $4\mathbf{T}_1+\text{Cs}^+$  monomer; Bottom: experimental results showing a combined signal of major  $4\mathbf{T}_1+\text{Cs}^+$  monomer and minor  $4\mathbf{T}_1+\text{Cs}^+$  dimer.

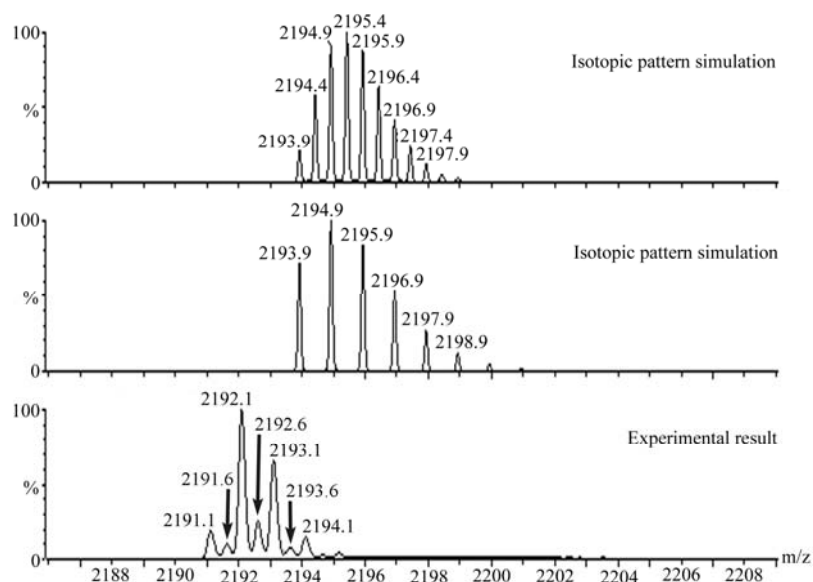

Figure S22. Comparison between experimental results and simulated isotopic patterns for TOF-ESI-MS of  $5\mathbf{T}_1+\text{Cs}^+$  monomer ( $\mathbf{T}_1$ -pentamer) and  $5\mathbf{T}_1+\text{Cs}^+$  dimer (or dimeric  $\mathbf{T}_1$ -pentamers). Top: isotopic pattern simulation for  $5\mathbf{T}_1+\text{Cs}^+$  dimer; Middle: isotopic pattern simulation for  $5\mathbf{T}_1+\text{Cs}^+$  monomer; Bottom: experimental results showing a combined signal of major  $5\mathbf{T}_1+\text{Cs}^+$  monomer and minor  $5\mathbf{T}_1+\text{Cs}^+$  dimer.

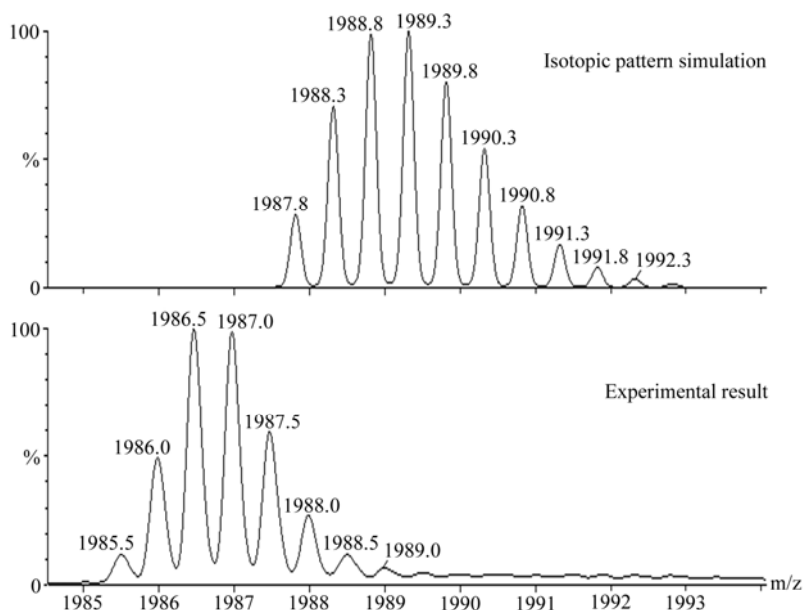

Figure S23. Comparison between experimental result and simulated isotopic pattern for TOF-ESI-MS of  $[4\mathbf{T}_1+\text{Cs}^+]+[5\mathbf{T}_1+\text{Cs}^+]$  ion.

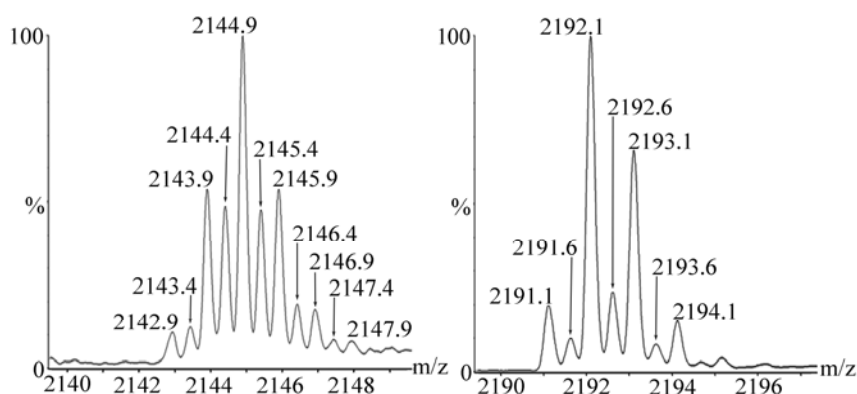

Figure S24. Positive ion-mode TOF-ESI-MS sections for  $\mathbf{T}_1$ -pentamers and dimeric  $\mathbf{T}_1$ -pentamers in acetonitrile. Left: combined signal of  $5\mathbf{T}_1+\text{Rb}^+$  monomer and  $5\mathbf{T}_1+\text{Rb}^+$  dimer; right: combined signal of major  $5\mathbf{T}_1+\text{Cs}^+$  monomer and minor  $5\mathbf{T}_1+\text{Cs}^+$  dimer.
